# Supplementary material for: Understanding how the design and implementation of Online Consultations influence primary care outcomes: Systematic review of evidence with recommendations for designers, providers, and researchers
Source: medRxiv preprint, doi:10.1101/2022.02.21.22271185, version 1 (2022-02-21)
Supplement: Appendix 5 [file 271185_file09.docx]

**Appendix 5: Description of Online Consultation systems studied**

| **Software program (if stated)** | **Description** | **Relevant features from Table 1** | **Papers** |
| --- | --- | --- | --- |
| eConsult (previously WebGP) | Online platform which includes symptom checker, pharmacy advice, administrative service, and e-consultation. To submit an e-consultation, patients complete an online form to provide a structured medical account of their condition. Once received, clinicians contact the patient, usually by telephone. | - One-way communication only - Multiple choice questionnaires with optional free-text - No integration - No artificial intelligence | [1-9] |
| Tele-Doc | A condition-specific online questionnaire with five sections, all of which must be completed. Received by the practice as an email attachment and dealt with according to locally specified organisational routines. | - One-way communication only - Multiple choice questionnaires with optional free-text - No integration - No artificial intelligence | [10] |
| eVisit or UPMC HealthTrak (MyChart/Epic Corporation) | Patient selects a condition, completes the structured documentation and submits the eVisit via the portal. Support staff review and forward the submission to a physician. | - Asynchronous two-way communication - Multiple choice questionnaires with optional free-text - Electronic health record integration - Adapting patient questions during query submission - Pre-programmed logic | [11-15] |
| Flow Platform (Doctrin AB) | Patients choose among a prespecified list of queries and access a structured patient interviewing software, where patients can briefly formulate ideas, concerns, and expectations, and subsequently answer a symptom-specific multiple-choice survey. The software selects suitable subsequent survey questions based on the patient’s answers. A healthcare provider (usually a nurse) then contacts the patient. | - Asynchronous two-way communication - Multiple choice questionnaires with optional free-text - No integration - Adapting patient questions during query submission - Artificial intelligence method: unclear | [16-19] |
| Mayo Clinic Patient Portal | Computer directed interview resulting in a structured message to the provider with information pertinent to the new symptom. Providers respond to e-visits by text (secure message) or telephone. | - Asynchronous two-way communication - Multiple choice questionnaires only - No integration - No artificial intelligence | [20, 21] |
| Intuit | Patients enter reported problem (e.g. back pain) and then answer questions one at a time. Questions branch such that history is organized into a readable clinical format. Including validated diagnostic instruments, photo uploads, and additional free-text following completion of questionnaire. | - Asynchronous two-way communication - Multiple choice questionnaires with optional free-text - No integration - Adapting patient questions during query submission - Pre-programmed logic | [22] |
| Patient portal self-triage and self-scheduling tool for COVID-19 | Automated symptom assessment, triage, and appointment scheduling for patients with concerning symptoms or questions about COVID-19. After answering a series of questions, patients are segmented into risk categories and directed to 1 of 4 endpoints. Basic demographic information is automatically populated from the patient’s medical record. Clinicians only review encounters if patients call the triage hotline or clinic or make an appointment. | - One-way communication only - Multiple choice questionnaires only - Electronic health record integration - Appointment scheduling - Adapting patient questions during query submission - Prioritising patient queries based on clinical urgency - Signposting patients to the most appropriate care provider - Pre-programmed logic | [23] |
| Babylon GP at Hand | Includes an ‘AI’ triage system based on “chat-bot” symptom-checker. Patients are provided with advice, which might be self-care, message a clinician or have a telephone/video call. | - Asynchronous two-way communication - Synchronous real-time communication - Multiple choice questionnaires with optional free-text - Electronic health record integration - Prioritising patient queries based on clinical urgency - Signposting patients to the most appropriate care provide - Artificial intelligence method: unclear | [24] |
| Dr iQ | Algorithms with screening questions. Submissions are reviewed by a group of clinicians. | - Asynchronous two-way communication - Synchronous real-time communication - Multiple choice questionnaires only - No integration - Adapting patient questions during query submission - Pre-programmed logic | [25] |
| askmyGP | An online form detailing background and query, which is reviewed by administrative and clinician staff. | - One-way communication only - Multiple choice questionnaires with optional free-text - No integration - No artificial intelligence | [1, 9, 26] |
| MedicInfo | Free-text request sent to the GP. When answering, clinicians use one of four possible protocols. | - Asynchronous two-way communication - Unstructured free-text only - No integration - No artificial intelligence | [27] |
| eConsulta | Users choose which health professional to direct their enquiry to and attach files, while keeping a record of previous interactions. | - Asynchronous two-way communication - Unstructured free-text only - Electronic health record integration - No artificial intelligence | [28-30] |
| Digital Doctor Reception (DDR) | Patients complete a “medical history,” including cause of contact, background disease/s, and current inconvenience. Record form is handled digitally by a GP and continued through written digital dialogue. | - Asynchronous two-way communication - Multiple choice questionnaires with optional free-text - Electronic health record integration - No artificial intelligence | [31] |
| Think Research platform and Novari platform | Patients can request visits to be completed through secure messaging, audio and/or video. Once a patient request is sent, the primary care provider receives a notification on the platform and through email. They log into the platform to see the request and respond through any of the three modalities. | - Asynchronous two-way communication - Synchronous real-time communication - Unstructured free-text only - No integration - No artificial intelligence | [32] |
| Epic’s MyChart patient portal | Patient chooses the e-visit condition that matches their symptoms and fills out a condition-specific questionnaire. Once the questionnaire is complete, the provider reviews it and responds to the patient with a treatment plan. | - Asynchronous two-way communication - Multiple choice questionnaires only - Electronic health record integration - No artificial intelligence | [33] |
| Docly online consultation | Patients select their health problem, then fill in a guided questionnaire about their symptoms. Decision support algorithms recommend the most appropriate outcome to the clinician based on questionnaire answers, before either providing immediate advice or a further assessment is made by a GP. Health problems requiring more complex care are referred to specialist care services. Emergency situations are flagged by the smart algorithms, with patients receiving advice to contact urgent care services. | - Asynchronous two-way communication - Multiple choice questionnaires only - No integration - Prioritising patient queries based on clinical urgency - Signposting patients to the most appropriate care provider - Pre-programmed logic | [34] |
| Unnamed (chat automation system) | Patients specify which medical problem they are seeking advice for and answer predefined questions derived for this problem, and then describe their symptoms using a chat with nurses and/or physicians. | - Asynchronous two-way communication - Multiple choice questionnaires with optional free-text - No integration - Adapting patient questions during query submission - Artificial intelligence method: unclear | [35] |
| Unnamed (eVisit) | Patient submits answers to predetermined questions, which are reviewed by Advanced Practice Providers. | - Asynchronous two-way communication - Multiple choice questionnaires only - No integration - Adapting patient questions during query submission - Pre-programmed logic | [36] |
| Unnamed (eVisit) | Patient selects their symptom/ healthcare concern from a menu and is directed to a symptom-specific structured set of algorithmic questions. Nurses review submissions. | - Asynchronous two-way communication - Multiple choice questionnaires only - Electronic health record integration - Adapting patient questions during query submission - Pre-programmed logic | [37] |
| Unnamed (Online visits) | Using a branching logic program, medical history is obtained, along with patient-provided medication list, pharmacy of choice, and vital signs. Once the specific request is completed by the patient, it is sent to the patient’s physician for review. | - Asynchronous two-way communication - Multiple choice questionnaires only - No integration - Adapting patient questions during query submission - Automated history taking - Pre-programmed logic | [38] |
| Unnamed (eVisits) | Patient-completed symptom specific question sets sent to a pool of Advanced Practice Providers via a secure online patient portal. | - Asynchronous two-way communication - Multiple choice questionnaires only - No integration - No artificial intelligence | [39] |
| Unnamed (e-consultation) | Patients initiate an e-consultation by logging into a level 4 security portal, where a written message can be sent to the GP. | - Asynchronous two-way communication - Unstructured free-text only - No integration - No artificial intelligence | [40] |
| Unnamed (Digital primary health care (DPHC) service) | Patients enter medical history, reason for contact, background disease(s), and current inconvenience. Record form is then digitally reviewed by a general practitioner (GP), who contacts the patient. | - Asynchronous two-way communication - Multiple choice questionnaires with optional free-text - No integration - No artificial intelligence | [41] |
| Unnamed (chat-based and automated medical history–taking service) | Before the chat, an automated medical history–taking service is offered, where the patient responds to a questions about their chief complaint and current health status. | - Asynchronous two-way communication - Multiple choice questionnaires with optional free-text - No integration - Adapting patient questions during query submission - Pre-programmed logic | [42] |
| Unnamed (e-visits) | Patients log into their secure personal health record internet portal and answer a series of questions about their condition. This written information is sent to the physicians, who make a diagnosis, order necessary care, put a note in the patients' electronic medical records, and reply to the patients via the secure portal within several hours. | - Asynchronous two-way communication - Patient query format: unclear - No integration - No artificial intelligence | [43] |
| Unnamed (e-consultation) | An online text-based clinical consultation with the GP, used only for known health conditions. Accessed by secure login to the national health portal. Includes a medical assessment of the patient’s request and is considered complete when the doctor has processed the inquiry and provided an answer. | - Asynchronous two-way communication - Patient query format: unclear - Electronic health record integration - No artificial intelligence | [44] |
| Unnamed (virtual visits) | Patients log in to an online portal to initiate a visit. Their primary care provider accepts the visit and responds in the most appropriate modality. The platform is primarily intended for two-way communication between the patient and the provider, however, patients can also request copies of lab results and prescription renewals. | - Asynchronous two-way communication - Synchronous real-time communication - Patient query format: unclear - No integration - No artificial intelligence | [45] |
| Unnamed (online consultations) | Allows patients to remotely and asynchronously contact a GP using a computer, smartphone, or tablet to ask questions and describe symptoms in writing. | - Communication mode: Unclear - Multiple choice questionnaires with optional free-text - No integration - No artificial intelligence | [46] |
| Unnamed (online consultations) | Allows patients to remotely and asynchronously contact a GP using a computer, smartphone, or tablet to ask questions and describe symptoms in writing. | - Communication mode: Unclear - Multiple choice questionnaires - No integration - No artificial intelligence | [46] |
| Unnamed (online consultations) | Allows patients to remotely and asynchronously contact a GP using a computer, smartphone, or tablet to ask questions and describe symptoms in writing. | - Communication mode: Unclear - Multiple choice questionnaires - No integration - Prioritising patient queries based on clinical urgency - Pre-programmed logic | [46] |
| Unnamed | Detailed description of features unavailable |  | [47-62] |

**References**

1. Atherton H, Brant H, Ziebland S, Bikker A, Campbell J, Gibson A, et al. The potential of alternatives to face-to-face consultation in general practice, and the impact on different patient groups: a mixed-methods case study. Health Serv Deliv Res 2018;6(20). PMID: 29889485. doi: 10.3310/hsdr06200.

2. Cowie J, Calveley E, Bowers G, Bowers J. Evaluation of a digital consultation and self-care advice tool in primary care: A multi-methods study. Int J Environ Res Public Health. 2018 02 May;15 (5) (896). doi: 10.3390/ijerph15050896.

3. NHS England. Prime Minister’s Challenge Fund: Improving Access to General Practice First Evaluation Report. NHS England; 2015 [updated October; cited 2020 1 Sept]; Available from: <https://www.england.nhs.uk/wp-content/uploads/2015/10/pmcf-wv-one-eval-report.pdf>.

4. Matheson C. Implementation of WebGP and Econsultations in Wessex GP Practices: Interim Update Report. Southampton, UK: Centre of Implementation Science; 2016 [updated June; cited 2020 1 Sept]; Available from: <https://eprints.soton.ac.uk/397189/1/__soton.ac.uk_ude_personalfiles_users_cbm1a13_mydocuments_CBM%2520WebGP%2520update%252021062016IR.pdf>.

5. Carter M, Fletcher E, Sansom A, Warren FC, Campbell JL. Feasibility, acceptability and effectiveness of an online alternative to face-to-face consultation in general practice: a mixed-methods study of webGP in six Devon practices. BMJ Open. 2018 May;8(2). PMID: WOS:000433129800107. doi: 10.1136/bmjopen-2017-018688.

6. Farr M, Banks J, Edwards HB, Northstone K, Bernard E, Salisbury C, et al. Implementing online consultations in primary care: a mixed-method evaluation extending normalisation process theory through service co-production. BMJ Open. 2018 Mar;8(3). PMID: WOS:000433881200172. doi: 10.1136/bmjopen-2017-019966.

7. Banks J, Farr M, Salisbury C, Bernard E, Northstone K, Edwards H, et al. Use of an electronic consultation system primary care: a qualitative interview study. Br J Gen Pract. 2018 Jan;68(666):E1-E8. PMID: WOS:000425962100001. doi: 10.3399/bjgp17X693509.

8. Edwards HB, Marques E, Hollingworth W, Horwood J, Farr M, Bernard E, et al. Use of a primary care online consultation system, by whom, when and why: Evaluation of a pilot observational study in 36 general practices in South West England. BMJ Open. 2017;7(11). doi: 10.1136/bmjopen-2017-016901.

9. Atherton H, Brant H, Ziebland S, Bikker A, Campbell J, Gibson A, et al. Alternatives to the face-to-face consultation in general practice: Focused ethnographic case study. Br J Gen Pract. 2018 April;68(669):e293-e300. doi: 10.3399/bjgp18X694853.

10. Casey M, Shaw S, Swinglehurst D. Experiences with online consultation systems in primary care: Case study of one early adopter site. Br J Gen Pract. 2017 November;67(664):e736-e43. doi: 10.3399/bjgp17X693137.

11. Jung C, Padman R. Virtualized healthcare delivery: Understanding users and their usage patterns of online medical consultations. Int J Med Inform. 2014;83(12):901-14. doi: 10.1016/j.ijmedinf.2014.08.004.

12. Padman R, Shevchik G, Paone S, Dolezal C, Cervenak J. eVisit: a pilot study of a new kind of healthcare delivery. Stud Health Technol Inform. 2010;160(Pt 1):262-6. PMID: 20841690.

13. Albert SM, Shevchik GJ, Paone S, Martich GD. Internet-based medical visit and diagnosis for common medical problems: experience of first user cohort. Telemed J E Health. 2011 May;17(4):304-8. PMID: 21457013. doi: 10.1089/tmj.2010.0156.

14. Jung C, Padman R, Shevchik G, Paone S. Who are portal users vs. early e-Visit adopters? A preliminary analysis. AMIA Annu Symp Proc. 2011:1070-9. PMID: 22195168.

15. Mehrotra A, Paone S, Martich GD, Albert SM, Shevchik GJ. Characteristics of Patients Who Seek Care via eVisits Instead of Office Visits. Telemed J E Health. 2013 2013/07/01;19(7):515-9. doi: 10.1089/tmj.2012.0221.

16. Peber E, Wästfelt E. Impact of digi-physical healthcare. [Master Thesis] Sweden: Lund University; 2020 [cited 2020 1 Sept]; Available from: <https://lup.lub.lu.se/student-papers/search/publication/9015211>.

17. Entezarjou A, Bolmsjö BB, Calling S, Midlöv P, Milos Nymberg V. Experiences of digital communication with automated patient interviews and asynchronous chat in Swedish primary care: a qualitative study. BMJ Open. 2020;10(7):e036585. doi: 10.1136/bmjopen-2019-036585.

18. Entezarjou A, Bonamy A-KE, Benjaminsson S, Herman P, Midlöv P. Human- Versus Machine Learning–Based Triage Using Digitalized Patient Histories in Primary Care: Comparative Study. JMIR Med Inform. 2020;8(9):e18930. PMID: 32880578. doi: 10.2196/18930.

19. Eldh AC, Sverker A, Bendtsen P, Nilsson E. Health Care Professionals' Experience of a Digital Tool for Patient Exchange, Anamnesis, and Triage in Primary Care: Qualitative Study. JMIR Hum Factors. 2020;7(4):e21698. PMID: 33315014. doi: 10.2196/21698.

20. North F, Crane SJ, Chaudhry R, Ebbert JO, Ytterberg K, Tulledge-Scheitel SM, et al. Impact of Patient Portal Secure Messages and Electronic Visits on Adult Primary Care Office Visits. Telemed J E Health. 2014 2014/03/01;20(3):192-8. doi: 10.1089/tmj.2013.0097.

21. North F, Crane SJ, Stroebel RJ, Cha SS, Edell ES, Tulledge-Scheitel SM. Patient-generated secure messages and eVisits on a patient portal: are patients at risk? J Am Med Inform Assoc. 2013;20(6):1143-9. doi: 10.1136/amiajnl-2012-001208.

22. Adamson SC, Bachman JW. Pilot Study of Providing Online Care in a Primary Care Setting. Mayo Clin Proc. 2010;85(8):704-10. doi: 10.4065/mcp.2010.0145.

23. Judson TJ, Odisho AY, Neinstein AB, Chao J, Williams A, Miller C, et al. Rapid design and implementation of an integrated patient self-triage and self-scheduling tool for COVID-19. J Am Med Inform Assoc. 2020;27(6):860-6. PMID: 32267928. doi: 10.1093/jamia/ocaa051.

24. Ipsos MORI, York Health Economics Consortium. Evaluation of Babylon GP at Hand: Final evaluation report. London2019 [cited 2020 1 Sept]; Available from: <https://www.hammersmithfulhamccg.nhs.uk/media/156123/Evaluation-of-Babylon-GP-at-Hand-Final-Report.pdf>.

25. Leung K, Qureshi S. Managing high frequency users of an electronic consultation system in primary care: a quality improvement project. BMJ Open Qual. 2021;10(2). PMID: WOS:000663456800001. doi: 10.1136/bmjoq-2020-001310.

26. Eccles A, Hopper M, Turk A, Atherton H. Patient use of an online triage platform: a mixed-methods retrospective exploration in UK primary care. Br J Gen Pract. 2019 May;69(682):E336-E44. PMID: WOS:000510826900006. doi: 10.3399/bjgp19X702197.

27. Nijland N, van Gemert-Pijnen J, Kelders SM, Brandenburg BJ, Seydel ER. Evaluation of the use of an "ask-the-expert" e-consultation service for support on health-related requests. Second International Conference on eHealth, Telemedicine, and Social Medicine; 10-16 Feb. 2010: IEEE; 2010. p. 72-6.

28. López Seguí F, Walsh S, Solans O, Adroher Mas C, Ferraro G, García-Altés A, et al. Teleconsultation Between Patients and Healthcare Professionals in the Catalan Primary Care Service: Message Annotation Analysis in a Retrospective Cross-Sectional Study. J Med Internet Res. 2020 Sep 17;22(9)(e19149). doi: 10.2196/19149.

29. López Seguí F, Vidal-Alaball J, Sagarra Castro M, García-Altés A, García Cuyàs F. General Practitioners’ Perceptions of Whether Teleconsultations Reduce the Number of Face-to-face Visits in the Catalan Public Primary Care System: Retrospective Cross-Sectional Study. J Med Internet Res. 2020 2020/3/16;22(3):e14478. doi: 10.2196/14478.

30. Fernández OS, Seguí FL, Vidal-Alaball J, Bonet Simo JM, Vian OH, Cabo PR, et al. Primary Care Doctor Characteristics That Determine the Use of Teleconsultations in the Catalan Public Health System: Retrospective Descriptive Cross-Sectional Study. JMIR Med Inform. 2020 2020/2/1;8(1):e16484. doi: 10.2196/16484.

31. Johansson A, Larsson M, Ivarsson B. General Practitioners' Experiences of Digital Written Patient Dialogues: A Pilot Study Using a Mixed Method. J Prim Care Community Health. 2020 Mar;11. PMID: WOS:000523514400001. doi: 10.1177/2150132720909656.

32. Stamenova V, Agarwal P, Kelley L, Fujioka J, Nguyen M, Phung M, et al. Uptake and patient and provider communication modality preferences of virtual visits in primary care: a retrospective cohort study in Canada. BMJ Open. 2020;10(7):e037064. doi: 10.1136/bmjopen-2020-037064.

33. Player M, O’Bryan E, Sederstrom E, Pinckney J, Diaz V. Electronic Visits For Common Acute Conditions: Evaluation Of A Recently Established Program. Health Aff. 2018 2018/12/01;37(12):2024-30. doi: 10.1377/hlthaff.2018.05122.

34. Nijhof D, Ingram A, Ochieng R, Roberts E-J, Poulton B, Ochieng B. Examining GP online consultation in a primary care setting in East Midlands, UK. BMC Health Serv Res. 2021 2021/09/30;21(1):1030. doi: 10.1186/s12913-021-07039-2.

35. Cajander Å, Larusdottir M, Hedström G. The effects of automation of a patient-centric service in primary care on the work engagement and exhaustion of nurses. Qual User Exp. 2020 19 Sept;5(1):9. doi: 10.1007/s41233-020-00038-x.

36. Penza KS, Murray MA, Myers JF, Furst JW, Pecina JL. Management of Acute Sinusitis via e-Visit. Telemed J E Health. 2021. doi: 10.1089/tmj.2020.0047.

37. Penza KS, Murray MA, Pecina JL, Myers JF, Furst JW. Electronic Visits for Minor Acute Illnesses: Analysis of Patient Demographics, Prescription Rates, and Follow-Up Care Within an Asynchronous Text-Based Online Visit. Telemed J E Health. 2018 2018/03/01;24(3):210-5. doi: 10.1089/tmj.2017.0091.

38. Rohrer JE, Angstman KB, Adamson SC, Bernard ME, Bachman JW, Morgan ME. Impact of online primary care visits on standard costs: a pilot study. Popul Health Manag. 2010 Apr;13(2):59-63. PMID: 20415617. doi: 10.1089/pop.2009.0018.

39. Murray MA, Penza KS, Myers JF, Furst JW, Pecina JL. Comparison of eVisit Management of Urinary Symptoms and Urinary Tract Infections with Standard Care. Telemed J E Health. 2020 2020/05/01;26(5):639-44. doi: 10.1089/tmj.2019.0044.

40. Fagerlund AJ, Holm IM, Zanaboni P. General practitioners' perceptions towards the use of digital health services for citizens in primary care: A qualitative interview study. BMJ Open. 2019 01 May;9 (5)(e028251). doi: 10.1136/bmjopen-2018-028251.

41. Johansson A, Larsson M, Ivarsson B. Patients' Experiences With a Digital Primary Health Care Concept Using Written Dialogues: A Pilot Study. J Prim Care Community Health. 2020 01 Jan;11:2150132720910564. doi: 10.1177/2150132720910564.

42. Nilsson E, Sverker A, Bendtsen P, Eldh AC. A Human, Organization, and Technology Perspective on Patients’ Experiences of a Chat-Based and Automated Medical History–Taking Service in Primary Health Care: Interview Study Among Primary Care Patients. J Med Internet Res. 2021 2021/10/18;23(10):e29868. doi: 10.2196/29868.

43. Mehrotra A, Paone S, Martich GD, Albert SM, Shevchik GJ. A comparison of care at e-visits and physician office visits for sinusitis and urinary tract infection. JAMA Intern Med. 2013;173(1):72-4. PMID: 23403816. doi: 10.1001/2013.jamainternmed.305.

44. Zanaboni P, Fagerlund AJ. Patients' use and experiences with e-consultation and other digital health services with their general practitioner in Norway: Results from an online survey. BMJ Open. 2020 17 Jun;10 (6) (e034773). doi: 10.1136/bmjopen-2019-034773.

45. Kelley LT, Phung M, Stamenova V, Fujioka J, Agarwal P, Onabajo N, et al. Exploring how virtual primary care visits affect patient burden of treatment. Int J Med Inform. 2020 2020/09/01/;141:104228. doi: <https://doi.org/10.1016/j.ijmedinf.2020.104228>.

46. Turner A, Morris R, Rakhra D, Stevenson F, McDonagh L, Hamilton F, et al. Unintended consequences of online consultations: a qualitative study in UK primary care. Br J Gen Pract. 2022;72(715):e128. doi: 10.3399/BJGP.2021.0426.

47. Andersen KN, Nielsen JA, Kim S. Use, cost, and digital divide in online public health care: lessons from Denmark. Transforming Government- People Process and Policy. 2019 May;13(2):197-211. PMID: WOS:000484192600004. doi: 10.1108/tg-06-2018-0041.

48. NHS England, NHS Improvement. Online consultations research: Summary research findings. NHS England and NHS Improvement; 2019 [updated February; cited 2020 1 Sept]; Available from: <https://www.england.nhs.uk/wp-content/uploads/2019/09/online-consultations-reserach-summary-of-findings.pdf>.

49. Lawless M, Wright E, Davidson J. A collaborative approach to improving patient access in general practice: Impact of three different pilot schemes in 12 general practices in Greenwich. London J Prim Care. 2016;8(4):56-65. doi: 10.1080/17571472.2016.1173946.

50. McGrail KM, Ahuja MA, Leaver CA. Virtual Visits and Patient-Centered Care: Results of a Patient Survey and Observational Study. J Med Internet Res. 2017 2017/05/26;19(5):e177. doi: 10.2196/jmir.7374.

51. Peabody MR, Dai M, Turner K, Peterson LE, Mainous AG. Prevalence and Factors Associated with Family Physicians Providing E-Visits. J Am Board Fam Med. 2019;32(6):868. doi: 10.3122/jabfm.2019.06.190081.

52. Wilson G, Currie O, Bidwell S, Saeed B, Dowell A, Halim AA, et al. Empty waiting rooms: the New Zealand general practice experience with telehealth during the COVID-19 pandemic. N Z Med J. 2021 09 Jul;134(1537):89-101.

53. Tarn DM, Hintz C, Mendez-Hernandez E, Sawlani SP, Bholat MA. Using virtual visits to care for primary care patients with COVID-19 symptoms. J Am Board Fam Med. 2021 February;34:S147-S51. doi: <https://doi.org/10.3122/jabfm.2021.S1.200241>.

54. Health Innovation Manchester. GM Digital First Primary Care: Patient and public insights: Workshop results. Report. Manchester: Health Innovation Manchester, 2021 Sept 2021. Report No.: 1 Contract No.: 1 Sept.

55. Bavafa H, Hitt LM, Terwiesch C. The Impact of E-Visits on Visit Frequencies and Patient Health: Evidence from Primary Care. Manage Sci. 2018;64(12):5461-80. PMID: 33033417. doi: 10.1287/mnsc.2017.2900.

56. Health Innovation Manchester. Greater Manchester digital primary care insight full report: Key findings from engagement June-July 2020. [Report] 2020 [cited 2021 1 Oct]; Available from: <https://healthinnovationmanchester.com/wp-content/uploads/2020/12/PCIE-DPC-Full-report-FINAL-20.10.20-1.pdf>.

57. Bertelsen P, Petersen L. Danish Citizens and General Practitioners' Use of ICT for their Mutual Communication. In: Sarkar I.N, Georgiou A, Mazzoncini de Azevedo Marques P, editors. MEDINFO 2015: eHealth-enabled Health; August; São Paulo, Brazil: IOS Press; 2015. p. 376-9.

58. Landgren S, Cajander Å. Non-use of Digital Health Consultations Among Swedish Elderly Living in the Countryside. Front Public Health. 2021 2021-September-10;9(1323). doi: 10.3389/fpubh.2021.588583.

59. Murphy M, Scott LJ, Salisbury C, Turner A, Scott A, Denholm R, et al. Implementation of remote consulting in UK primary care following the COVID-19 pandemic: a mixed-methods longitudinal study. Br J Gen Pract. 2021;71(704):e166-e77. doi: 10.3399/bjgp.2020.0948.

60. Hertzog R, Johnson J, Smith J, McStay FW, da Graca B, Haneke T, et al. Diagnostic Accuracy in Primary Care E-Visits: Evaluation of a Large Integrated Health Care Delivery System's Experience. Mayo Clin Proc. 2019;94(6):976-84. doi: 10.1016/j.mayocp.2019.02.011.

61. Bishop TF, Press MJ, Mendelsohn JL, Casalino LP. Electronic communication improves access, but barriers to its widespread adoption remain. Health Aff. 2013;32(8):1361-7. doi: 10.1377/hlthaff.2012.1151.

62. Ekman B, Thulesius H, Wilkens J, Lindgren A, Cronberg O, Arvidsson E. Utilization of digital primary care in Sweden: Descriptive analysis of claims data on demographics, socioeconomics, and diagnoses. Int J Med Inform. 2019;127:134-40. doi: 10.1016/j.ijmedinf.2019.04.016.
