# Supplementary material for: Understanding how the design and implementation of Online Consultations influence primary care outcomes: Systematic review of evidence with recommendations for designers, providers, and researchers
Source: medRxiv preprint, doi:10.1101/2022.02.21.22271185, version 1 (2022-02-21)
Supplement: Appendix 7 [file 271185_file11.docx]

**Appendix 7: Low confidence findings for objective 1**

| **Theme** | **Subtheme** |
| --- | --- |
| **Effective** (providing care based on scientific knowledge to produce better clinical outcomes) | **Neutral and increased antibiotic prescribing rates**  **Description:** The same orhigher rate of prescribed antibiotics than through traditional consultations  **CERQual rating:** Low  **CERQual explanation:** Low adequacy and low coherence  **References:** [1-3], n=3  **Exemplar data:** Physicians were more likely to prescribe an antibiotic at an e-visit for either condition [sinusitis and UTI][1] |
| **Reduced antibiotic prescribing rates**  **Description:** Fewer antibiotics prescribed through OCs  **CERQual rating:** Low  **CERQual explanation:** Low adequacy and low coherence  **References:** [4-6], n=3  **Exemplar data:** Patients evaluated F2F were more likely to be given an antibiotic prescription (72% [108/ 150]) when compared with those evaluated through e-visit (56% [84/150]; p = 0.004) [5] |

**References**

1. Mehrotra A, Paone S, Martich GD, Albert SM, Shevchik GJ. A comparison of care at e-visits and physician office visits for sinusitis and urinary tract infection. JAMA Intern Med. 2013;173(1):72-4. PMID: 23403816. doi: 10.1001/2013.jamainternmed.305.

2. Peber E, Wästfelt E. Impact of digi-physical healthcare. [Master Thesis] Sweden: Lund University; 2020 [cited 2020 1 Sept]; Available from: <https://lup.lub.lu.se/student-papers/search/publication/9015211>.

3. Murray MA, Penza KS, Myers JF, Furst JW, Pecina JL. Comparison of eVisit Management of Urinary Symptoms and Urinary Tract Infections with Standard Care. Telemed J E Health. 2020 2020/05/01;26(5):639-44. doi: 10.1089/tmj.2019.0044.

4. Ipsos MORI, York Health Economics Consortium. Evaluation of Babylon GP at Hand: Final evaluation report. London2019 [cited 2020 1 Sept]; Available from: <https://www.hammersmithfulhamccg.nhs.uk/media/156123/Evaluation-of-Babylon-GP-at-Hand-Final-Report.pdf>.

5. Penza KS, Murray MA, Myers JF, Furst JW, Pecina JL. Management of Acute Sinusitis via e-Visit. Telemed J E Health. 2021. doi: 10.1089/tmj.2020.0047.

6. Tarn DM, Hintz C, Mendez-Hernandez E, Sawlani SP, Bholat MA. Using virtual visits to care for primary care patients with COVID-19 symptoms. J Am Board Fam Med. 2021 February;34:S147-S51. doi: <https://doi.org/10.3122/jabfm.2021.S1.200241>.
