# Supplementary material for: Understanding how the design and implementation of Online Consultations influence primary care outcomes: Systematic review of evidence with recommendations for designers, providers, and researchers
Source: medRxiv preprint, doi:10.1101/2022.02.21.22271185, version 1 (2022-02-21)
Supplement: Appendix 9 [file 271185_file13.docx]

**Appendix 9. Outcomes of Online Consultations in primary care (Table 2 – with exemplar data)**

| **Theme** | **Subtheme** |
| --- | --- |
| **Safety** (harm to patients) | **Decreased patient safety (qualitative)**  **Description:** Patient and staff perceptions that OCs worsened patient safety.  **CERQual rating:** High  **References:** [1-17], n=17  **Exemplar data:**  All groups felt that communicating via text led to some loss of communication nuance. While facial expressions and body language were already absent in telephone consultations, cues like tonality were further removed when moving to text-based communication. Staff felt that these cues, in certain situations, provided important ‘between the lines’ context for interpretation of the reported symptoms. [2] |
|  | **Neutral-increased patient safety (qualitative and quantitative)**  **Description:** No quantitative evidence of negative impacts on patient safety, with clinician and patient perceptions that OCs improved patient safety.  **CERQual rating:** High  **References:** [2, 3, 5-8, 18-36], n=25  **Exemplar data:**  There was no difference in apparent treatment failures between the three (telephone, F2F, eVisits) initial encounter types, as measured by antibiotic retreatment with an extension of the initially prescribed antibiotic, or an antibiotic change in therapy within the subsequent 30 days between initial encounter types. There were no statistically different clinical outcomes between the three initial encounter types as evaluated by diagnosis of pyelonephritis within the 30-day follow-up period... There were no hospitalizations or insistences of sepsis within 30 days of initial encounter in any patients. [18] |
| **Timeliness**  (reducing waits and delays) | **Increased access (qualitative and quantitative)**  **Description:** Easier and more convenient for patients to contact their primary care provider, and quicker to communicate with a health professional.  **CERQual rating:** High  **References:** [1-5, 7-9, 11-14, 16, 21-24, 27-29, 31-33, 37-42], n=29  **Exemplar data:**  “We were having a hard time getting through the receptionist at our doctor’s office to make appointments, so [our provider] suggested [virtual visits] as a way to get through to her for things that don’t require us to come into the office” – INTERVIEW P001, F… Virtual visits appeared to improve access to primary care through timely appointments with no booking required… Several survey and interview respondents commented on the difficulty they experienced when attempting to book in-person appointments, such as waiting on the phone with reception or the limited availability of same or next day appointments. Through the virtual visit platform, patients were able to have appointments with their PCP without needing to book them, thereby circumnavigating administrative staff. [23] |
| **Efficiency** (avoiding waste) | **Decreased workload (qualitative and quantitative)**  **Description:** Less work for staff and patients to provide and receive care, respectively.  **CERQual rating:** High  **References**: [1-3, 5-11, 16, 17, 19-27, 29-33, 36, 38-43], n=33  **Exemplar data:**  Advantages for GP offices included reduced phone load, increased efficiency, released time for medical assessments, less crowded waiting rooms and more precise communication. [21] |
|  | **Increased workload (qualitative and quantitative)**  **Description:** More work for staff and patients to provide and receive care, respectively.  **CERQual rating:** High  **References:** [1-3, 5, 6, 8, 9, 11, 13, 15, 21, 22, 24, 27, 29-31, 33, 38-42, 44-49], n=29  **Exemplar data:**  There was a perception that e-consultations could be changing the consultation threshold with patients more likely to complete an e-consultation for issues that may not have been raised through the usual appointment system. This led to a change and possible increase in the workload. This was seen as a different method of access, which brought with it a different type of enquiry: ‘It’s very easy to access and for some patients they may not have brought that particular niggle at all because actually they sort of thought it, we’re not sure, we need this, but because there is this way of e-consulting, then it is another way of coming in to consult with us.’ (CN07) [9] |
|  | **Decreased costs (qualitative and quantitative)**  **Description:** Lower costs for the healthcare system and patients to provide and receive care, respectively.  **CERQual rating:** High  **References:** [1, 3, 6, 7, 9-11, 19, 21, 23, 24, 32, 33, 35, 36, 38, 40, 43, 50, 51], n=20  **Exemplar data:**  After the intervention, the patients with a virtual visit had a lower trend than their matched controls (Can –$3.79, P=.01). The result was an apparent lower expenditure among the virtual visit group at the end of the follow-up period, but again this period was limited. The trends were the same when the outcome was primary care visits rather than costs… Nearly half (48.4%, 193/399) of patients indicated they would have gone to a walk-in clinic if the virtual visit had not been available, 20.3% (81/399) would have had an in-person visit with their doctor or regular place of care, and 10.8% (43/399) would have gone to the emergency department. [24] |
|  | **Increased costs (qualitative and quantitative)**  **Description:** Higher costs for the healthcare system.  **CERQual rating:** High  **References:** [3, 6, 7, 9, 11, 21, 42, 45, 49], n=9  **Exemplar data:**  The average cost for the initial practice response to an e-consultation was £36.28. In context, the national estimates of cost for a standard GP face-to-face consultation is £33.00. The cost was driven mainly by the time needed for a GP to triage the e-consultations and the relatively high proportion of e-consultations that resulted in a face-to-face or telephone consultation with a GP. [49] |
| **Equitable** (variation because of personal characteristics) | **Decreased equity (qualitative and quantitative)**  **Description:** OC use variation based on patient characteristics.  **CERQual rating**: High  **References:** [1, 3, 7-9, 11-14, 16-24, 32-34, 36, 38, 39, 41-45, 47-49, 51-58], n=40  **Exemplar data:**  The experience described through this study is consistent with other international work showing that telehealth risks increasing inequity. [7] |
|  | **Increased equity (qualitative)**  **Description:** OCs helped patients communicate with their primary care providers who had previously struggled due to their personal characteristics.  **CERQual rating**: High  **References:** [1, 3, 7, 9, 11, 12, 14, 16, 21-23, 29, 38, 39, 41, 42, 45, 53, 57], n=19  **Exemplar data:**  Patients and GP staff commented on the benefits of providing individuals with different means of communicating with their GP. This flexibility was felt to ensure that patients felt they had a means of communicating in a way that suited them and they were comfortable with. [22] |
| **Patient-centredness** (care that is respectful and responsive) | **Decreased patient satisfaction (qualitative)**  **Description:** Negative patient experiences of using OCs.  **CERQual rating:** High  **References:** [1, 3, 11-13, 16, 22, 23, 26, 29, 33, 38, 41], n=13  **Exemplar data:** Some patients expressed a dislike of the asynchronous interaction offered by the platform: ‘If you’re under stress because you’re poorly, I’d prefer to speak to a human!’ (F, 47 years) [16] |
|  | **Increased patient satisfaction (qualitative and quantitative)**  **Description:** Positive patient experiences of using OCs.  **CERQual rating:** High  **References:** [1, 3, 4, 6-9, 11-14, 16, 17, 20-24, 26, 29, 30, 33, 35-42, 50], n=31  **Exemplar data:**  81% of the patients would recommend this DPHC concept to others (Q18), and a majority of the patients (72%) experienced equal or greater satisfaction with the service compared with a physical visit (Q16). Among those patients who were more satisfied with the DPHC concept (n = 36; 26%), their main reason was availability (Q17, Table 1). These responses correspond well with the overall satisfaction with DPHC (Md, 8.0; IQR, 6-9; Q19) [4] |

1. NHS England, NHS Improvement. Online consultations research: Summary research findings. NHS England and NHS Improvement; 2019 [updated February; cited 2020 1 Sept]; Available from: <https://www.england.nhs.uk/wp-content/uploads/2019/09/online-consultations-reserach-summary-of-findings.pdf>.

2. Entezarjou A, Bolmsjö BB, Calling S, Midlöv P, Milos Nymberg V. Experiences of digital communication with automated patient interviews and asynchronous chat in Swedish primary care: a qualitative study. BMJ Open. 2020;10(7):e036585. doi: 10.1136/bmjopen-2019-036585.

3. Atherton H, Brant H, Ziebland S, Bikker A, Campbell J, Gibson A, et al. The potential of alternatives to face-to-face consultation in general practice, and the impact on different patient groups: a mixed-methods case study. Health Serv Deliv Res 2018;6(20). PMID: 29889485. doi: 10.3310/hsdr06200.

4. Johansson A, Larsson M, Ivarsson B. Patients' Experiences With a Digital Primary Health Care Concept Using Written Dialogues: A Pilot Study. J Prim Care Community Health. 2020 01 Jan;11:2150132720910564. doi: 10.1177/2150132720910564.

5. Johansson A, Larsson M, Ivarsson B. General Practitioners' Experiences of Digital Written Patient Dialogues: A Pilot Study Using a Mixed Method. J Prim Care Community Health. 2020 Mar;11. PMID: WOS:000523514400001. doi: 10.1177/2150132720909656.

6. Eldh AC, Sverker A, Bendtsen P, Nilsson E. Health Care Professionals' Experience of a Digital Tool for Patient Exchange, Anamnesis, and Triage in Primary Care: Qualitative Study. JMIR Hum Factors. 2020;7(4):e21698. PMID: 33315014. doi: 10.2196/21698.

7. Wilson G, Currie O, Bidwell S, Saeed B, Dowell A, Halim AA, et al. Empty waiting rooms: the New Zealand general practice experience with telehealth during the COVID-19 pandemic. N Z Med J. 2021 09 Jul;134(1537):89-101.

8. Peber E, Wästfelt E. Impact of digi-physical healthcare. [Master Thesis] Sweden: Lund University; 2020 [cited 2020 1 Sept]; Available from: <https://lup.lub.lu.se/student-papers/search/publication/9015211>.

9. Banks J, Farr M, Salisbury C, Bernard E, Northstone K, Edwards H, et al. Use of an electronic consultation system primary care: a qualitative interview study. Br J Gen Pract. 2018 Jan;68(666):E1-E8. PMID: WOS:000425962100001. doi: 10.3399/bjgp17X693509.

10. Entezarjou A, Bonamy A-KE, Benjaminsson S, Herman P, Midlöv P. Human- Versus Machine Learning–Based Triage Using Digitalized Patient Histories in Primary Care: Comparative Study. JMIR Med Inform. 2020;8(9):e18930. PMID: 32880578. doi: 10.2196/18930.

11. Farr M, Banks J, Edwards HB, Northstone K, Bernard E, Salisbury C, et al. Implementing online consultations in primary care: A mixed-method evaluation extending normalisation process theory through service co-production. BMJ Open. 2018;8(3). doi: 10.1136/bmjopen-2017-019966.

12. Health Innovation Manchester. Greater Manchester digital primary care insight full report: Key findings from engagement June-July 2020. [Report] 2020 [cited 2021 1 Oct]; Available from: <https://healthinnovationmanchester.com/wp-content/uploads/2020/12/PCIE-DPC-Full-report-FINAL-20.10.20-1.pdf>.

13. Health Innovation Manchester. GM Digital First Primary Care: Patient and public insights: Workshop results. Report. Manchester: Health Innovation Manchester, 2021 Sept 2021. Report No.: 1 Contract No.: 1 Sept.

14. Landgren S, Cajander Å. Non-use of Digital Health Consultations Among Swedish Elderly Living in the Countryside. Front Public Health. 2021 2021-September-10;9(1323). doi: 10.3389/fpubh.2021.588583.

15. Cajander Å, Larusdottir M, Hedström G. The effects of automation of a patient-centric service in primary care on the work engagement and exhaustion of nurses. Qual User Exp. 2020 19 Sept;5(1):9. doi: 10.1007/s41233-020-00038-x.

16. Eccles A, Hopper M, Turk A, Atherton H. Patient use of an online triage platform: A mixed-methods retrospective exploration in UK primary care. Br J Gen Pract. 2019;69(682):E336-E44. doi: 10.3399/bjgp19X702197.

17. Padman R, Shevchik G, Paone S, Dolezal C, Cervenak J. eVisit: A Pilot Study of a New Kind of Healthcare Delivery. In: Safran C, Reti S, Marin HF, editors. Medinfo 2010, Pts I and Ii2010. p. 262-6.

18. Murray MA, Penza KS, Myers JF, Furst JW, Pecina JL. Comparison of eVisit Management of Urinary Symptoms and Urinary Tract Infections with Standard Care. Telemed J E Health. 2020 2020/05/01;26(5):639-44. doi: 10.1089/tmj.2019.0044.

19. Penza KS, Murray MA, Pecina JL, Myers JF, Furst JW. Electronic Visits for Minor Acute Illnesses: Analysis of Patient Demographics, Prescription Rates, and Follow-Up Care Within an Asynchronous Text-Based Online Visit. Telemed J E Health. 2018 2018/03/01;24(3):210-5. doi: 10.1089/tmj.2017.0091.

20. Albert SM, Shevchik GJ, Paone S, Martich GD. Internet-based medical visit and diagnosis for common medical problems: experience of first user cohort. Telemed J E Health. 2011 May;17(4):304-8. PMID: 21457013. doi: 10.1089/tmj.2010.0156.

21. Fagerlund AJ, Holm IM, Zanaboni P. General practitioners' perceptions towards the use of digital health services for citizens in primary care: A qualitative interview study. BMJ Open. 2019 01 May;9 (5)(e028251). doi: 10.1136/bmjopen-2018-028251.

22. Cowie J, Calveley E, Bowers G, Bowers J. Evaluation of a digital consultation and self-care advice tool in primary care: A multi-methods study. Int J Environ Res Public Health. 2018 02 May;15 (5) (896). doi: 10.3390/ijerph15050896.

23. Kelley LT, Phung M, Stamenova V, Fujioka J, Agarwal P, Onabajo N, et al. Exploring how virtual primary care visits affect patient burden of treatment. Int J Med Inform. 2020 2020/09/01/;141:104228. doi: <https://doi.org/10.1016/j.ijmedinf.2020.104228>.

24. McGrail KM, Ahuja MA, Leaver CA. Virtual Visits and Patient-Centered Care: Results of a Patient Survey and Observational Study. J Med Internet Res. 2017 2017/05/26;19(5):e177. doi: 10.2196/jmir.7374.

25. Judson TJ, Odisho AY, Neinstein AB, Chao J, Williams A, Miller C, et al. Rapid design and implementation of an integrated patient self-triage and self-scheduling tool for COVID-19. J Am Med Inform Assoc. 2020;27(6):860-6. PMID: 32267928. doi: 10.1093/jamia/ocaa051.

26. Zanaboni P, Fagerlund AJ. Patients' use and experiences with e-consultation and other digital health services with their general practitioner in Norway: Results from an online survey. BMJ Open. 2020 17 Jun;10 (6) (e034773). doi: 10.1136/bmjopen-2019-034773.

27. Murphy M, Scott LJ, Salisbury C, Turner A, Scott A, Denholm R, et al. Implementation of remote consulting in UK primary care following the COVID-19 pandemic: a mixed-methods longitudinal study. Br J Gen Pract. 2021;71(704):e166-e77. doi: 10.3399/bjgp.2020.0948.

28. Tarn DM, Hintz C, Mendez-Hernandez E, Sawlani SP, Bholat MA. Using virtual visits to care for primary care patients with COVID-19 symptoms. J Am Board Fam Med. 2021 February;34:S147-S51. doi: <https://doi.org/10.3122/jabfm.2021.S1.200241>.

29. Nilsson E, Sverker A, Bendtsen P, Eldh AC. A Human, Organization, and Technology Perspective on Patients’ Experiences of a Chat-Based and Automated Medical History–Taking Service in Primary Health Care: Interview Study Among Primary Care Patients. J Med Internet Res. 2021 2021/10/18;23(10):e29868. doi: 10.2196/29868.

30. Bishop TF, Press MJ, Mendelsohn JL, Casalino LP. Electronic communication improves access, but barriers to its widespread adoption remain. Health Aff. 2013;32(8):1361-7. doi: 10.1377/hlthaff.2012.1151.

31. López Seguí F, Vidal-Alaball J, Sagarra Castro M, García-Altés A, García Cuyàs F. General Practitioners’ Perceptions of Whether Teleconsultations Reduce the Number of Face-to-face Visits in the Catalan Public Primary Care System: Retrospective Cross-Sectional Study. J Med Internet Res. 2020 2020/3/16;22(3):e14478. doi: 10.2196/14478.

32. Adamson SC, Bachman JW. Pilot Study of Providing Online Care in a Primary Care Setting. Mayo Clin Proc. 2010;85(8):704-10. doi: 10.4065/mcp.2010.0145.

33. Matheson C. Implementation of WebGP and Econsultations in Wessex GP Practices: Interim Update Report. Southampton, UK: Centre of Implementation Science; 2016 [updated June; cited 2020 1 Sept]; Available from: <https://eprints.soton.ac.uk/397189/1/__soton.ac.uk_ude_personalfiles_users_cbm1a13_mydocuments_CBM%2520WebGP%2520update%252021062016IR.pdf>.

34. North F, Crane SJ, Stroebel RJ, Cha SS, Edell ES, Tulledge-Scheitel SM. Patient-generated secure messages and eVisits on a patient portal: are patients at risk? J Am Med Inform Assoc. 2013;20(6):1143-9. doi: 10.1136/amiajnl-2012-001208.

35. Lawless M, Wright E, Davidson J. A collaborative approach to improving patient access in general practice: Impact of three different pilot schemes in 12 general practices in Greenwich. London J Prim Care. 2016;8(4):56-65. doi: 10.1080/17571472.2016.1173946.

36. Player M, O'Bryan E, Sederstrom E, Pinckney J, Diaz V. Electronic Visits For Common Acute Conditions: Evaluation Of A Recently Established Program. Health Aff. 2018 Dec 2018;37(12):2024–30. PMID: 2151129411. doi: <http://dx.doi.org/10.1377/hlthaff.2018.05122>.

37. Leung K, Qureshi S. Managing high frequency users of an electronic consultation system in primary care: a quality improvement project. BMJ Open Qual. 2021;10(2). PMID: WOS:000663456800001. doi: 10.1136/bmjoq-2020-001310.

38. Ipsos MORI, York Health Economics Consortium. Evaluation of Babylon GP at Hand: Final evaluation report. London2019 [cited 2020 1 Sept]; Available from: <https://www.hammersmithfulhamccg.nhs.uk/media/156123/Evaluation-of-Babylon-GP-at-Hand-Final-Report.pdf>.

39. Carter M, Fletcher E, Sansom A, Warren FC, Campbell JL. Feasibility, acceptability and effectiveness of an online alternative to face-to-face consultation in general practice: a mixed-methods study of webGP in six Devon practices. BMJ Open. 2018 May;8(2). PMID: WOS:000433129800107. doi: 10.1136/bmjopen-2017-018688.

40. López Seguí F, Walsh S, Solans O, Adroher Mas C, Ferraro G, García-Altés A, et al. Teleconsultation Between Patients and Healthcare Professionals in the Catalan Primary Care Service: Message Annotation Analysis in a Retrospective Cross-Sectional Study. J Med Internet Res. 2020 Sep 17;22(9)(e19149). doi: 10.2196/19149.

41. Turner A, Morris R, Rakhra D, Stevenson F, McDonagh L, Hamilton F, et al. Unintended consequences of online consultations: a qualitative study in UK primary care. Br J Gen Pract. 2022;72(715):e128. doi: 10.3399/BJGP.2021.0426.

42. Atherton H, Brant H, Ziebland S, Bikker A, Campbell J, Gibson A, et al. Alternatives to the face-to-face consultation in general practice: Focused ethnographic case study. Br J Gen Pract. 2018 April;68(669):e293-e300. doi: 10.3399/bjgp18X694853.

43. Penza KS, Murray MA, Myers JF, Furst JW, Pecina JL. Management of Acute Sinusitis via e-Visit. Telemed J E Health. 2021. doi: 10.1089/tmj.2020.0047.

44. Stamenova V, Agarwal P, Kelley L, Fujioka J, Nguyen M, Phung M, et al. Uptake and patient and provider communication modality preferences of virtual visits in primary care: a retrospective cohort study in Canada. BMJ Open. 2020;10(7):e037064. doi: 10.1136/bmjopen-2020-037064.

45. Andersen KN, Nielsen JA, Kim S. Use, cost, and digital divide in online public health care: lessons from Denmark. Transforming Government- People Process and Policy. 2019 May;13(2):197-211. PMID: WOS:000484192600004. doi: 10.1108/tg-06-2018-0041.

46. Casey M, Shaw S, Swinglehurst D. Experiences with online consultation systems in primary care: Case study of one early adopter site. Br J Gen Pract. 2017 November;67(664):e736-e43. doi: 10.3399/bjgp17X693137.

47. Nijhof D, Ingram A, Ochieng R, Roberts E-J, Poulton B, Ochieng B. Examining GP online consultation in a primary care setting in East Midlands, UK. BMC Health Serv Res. 2021 2021/09/30;21(1):1030. doi: 10.1186/s12913-021-07039-2.

48. Bavafa H, Hitt LM, Terwiesch C. The Impact of E-Visits on Visit Frequencies and Patient Health: Evidence from Primary Care. Manage Sci. 2018;64(12):5461-80. PMID: 33033417. doi: 10.1287/mnsc.2017.2900.

49. Edwards HB, Marques E, Hollingworth W, Horwood J, Farr M, Bernard E, et al. Use of a primary care online consultation system, by whom, when and why: evaluation of a pilot observational study in 36 general practices in South West England. Bmj Open. 2017 Nov;7(11). PMID: WOS:000422898800064. doi: 10.1136/bmjopen-2017-016901.

50. Mehrotra A, Paone S, Martich GD, Albert SM, Shevchik GJ. A comparison of care at e-visits and physician office visits for sinusitis and urinary tract infection. JAMA Intern Med. 2013;173(1):72-4. PMID: 23403816. doi: 10.1001/2013.jamainternmed.305.

51. Rohrer JE, Angstman KB, Adamson SC, Bernard ME, Bachman JW, Morgan ME. Impact of online primary care visits on standard costs: a pilot study. Popul Health Manag. 2010 Apr;13(2):59-63. PMID: 20415617. doi: 10.1089/pop.2009.0018.

52. North F, Crane SJ, Chaudhry R, Ebbert JO, Ytterberg K, Tulledge-Scheitel SM, et al. Impact of Patient Portal Secure Messages and Electronic Visits on Adult Primary Care Office Visits. Telemed J E Health. 2014 2014/03/01;20(3):192-8. doi: 10.1089/tmj.2013.0097.

53. Jung CM, Padman R. Virtualized healthcare delivery: Understanding users and their usage patterns of online medical consultations. Int J Med Inform. 2014 Dec;83(12):901-14. PMID: WOS:000346052600004. doi: 10.1016/j.ijmedinf.2014.08.004.

54. Jung C, Padman R, Shevchik G, Paone S. Who are portal users vs. early e-Visit adopters? A preliminary analysis. AMIA Annu Symp Proc. 2011:1070-9. PMID: 22195168.

55. Bertelsen P, Petersen L. Danish Citizens and General Practitioners' Use of ICT for their Mutual Communication. In: Sarkar I.N, Georgiou A, Mazzoncini de Azevedo Marques P, editors. MEDINFO 2015: eHealth-enabled Health; August; São Paulo, Brazil: IOS Press; 2015. p. 376-9.

56. Mehrotra A, Paone S, Martich GD, Albert SM, Shevchik GJ. Characteristics of patients who seek care via eVisits instead of office visits. Telemed J E Health. 2013;19(7):515-9. PMID: 23682589. doi: 10.1089/tmj.2012.0221.

57. Ekman B, Thulesius H, Wilkens J, Lindgren A, Cronberg O, Arvidsson E. Utilization of digital primary care in Sweden: Descriptive analysis of claims data on demographics, socioeconomics, and diagnoses. Int J Med Inform. 2019;127:134-40. doi: 10.1016/j.ijmedinf.2019.04.016.

58. Nijland N, van Gemert-Pijnen J, Kelders SM, Brandenburg BJ, Seydel ER. Evaluation of the use of an "ask-the-expert" e-consultation service for support on health-related requests. Second International Conference on eHealth, Telemedicine, and Social Medicine; 10-16 Feb. 2010: IEEE; 2010. p. 72-6.
