# Supplementary material for: Understanding how the design and implementation of Online Consultations influence primary care outcomes: Systematic review of evidence with recommendations for designers, providers, and researchers
Source: medRxiv preprint, doi:10.1101/2022.02.21.22271185, version 1 (2022-02-21)
Supplement: Appendix 10 [file 271185_file14.docx]

**Appendix 10. How outcomes of Online Consultations in primary care are influenced by system design and implementation (Table 3 – with exemplar data)**

| **Theme** | **OC design feature or implementation** | **Outcome (from Table 2)** | **CERQual rating, references, and exemplar data** |
| --- | --- | --- | --- |
| **Condition** (illness OC is used for) | **Decreased complexity of query**  **Description:** Patient queries are straightforward and easy to resolve e.g. administrative tasks, minor acute illnesses, and prescription requests. | **Efficiency:** Decreased workload (qualitative and quantitative)  **Efficiency:** Decreased health costs (qualitative and quantitative) | **CERQual rating:** High  **References:** [1-11], n=11  **Exemplar data:**  The digital communication system also procured efficiency such as settling simple cases easily, relieving the telephone service of those minor issues that can be resolved by a single message turnaround… The findings suggested that the digital communication service was best suited to less complex matters… [3] |
|  | **Increased complexity of query**  **Description:** Patient queries are not straightforward and easy to resolve e.g. multiple ill-defined symptoms. | **Efficiency:** Increased workload (qualitative)  **Efficiency:** Increased health costs (qualitative and quantitative) | **CERQual rating:** High  **References:** [1, 3-5, 8, 12, 13], n=7  **Exemplar data:**  For patients presenting with a complex or new set of symptoms clinicians usually felt the need to talk to the patient directly: ‘When someone says, “I have felt unwell for 3 weeks with headache, dizziness, limb aches, vision’s blurred” it’s just impossible to actually disentangle that with an e-consult, you’ve got to see them.’ (CN17) [4] |
| **Technology** (material properties of OC) | **Multiple choice questionnaires (MCQ)**  **Description:** Patients describe their query by completing questionnaires and selecting their answers from a list. | **Efficiency:** Increased workload (qualitative) | **CERQual rating:** High  **References:** [3-5, 8, 11, 14-21], n=13  **Exemplar data:**  Some of the nurses explained that they needed to ask more questions in the chat system than in a phone call, because they did not trust the information to the same degree in the chat system as on the phone. One of the nurses explains:  “It may not belong [in the patient’s case], while in the chat they only get the standard questions in the questionnaire and then they have answered yes to many different things, which they probably have [symptoms of] but may not at the moment or do not relate to what they are looking for help right now. So then I have to dig more into it”. [18] |
|  |  | **Patient-centredness:** Decreased patient satisfaction (qualitative) | **CERQual rating:** High  **References**: [3, 5, 11, 15-17, 19-21], n=9  **Exemplar data:**  Although patients appreciated the potential benefits of an automated history-taking system, they expressed a sense of unease in answering the questions in certain ways, leading to undesired consequences, such as selecting a response alternative that guided them away from the line of questioning that they felt was relevant, with no opportunity to retract. The back-up, that is the possibility in the subsequent chat for correcting any mistakes from the automated history-taking procedure, was considered reassuring but ineffective, duplicating efforts. [19] |
|  | **Free-text input**  **Description:** Patients describe their query using unstructured text. | **Efficiency:** Decreased workload (qualitative and quantitative)  **Safety:** Increased patient safety (qualitative) | **CERQual rating:** High  **References:** [1, 14, 16, 22-25], n=7  **Exemplar data:**  A physician at Group Health sends his patients a secure message several days before their appointment asking for their concerns. This improves the efficiency of office visits: “half the time they’ve written the history of present illness. I just copy and paste it into the EMR.” [23] |
|  | **Asynchronous two-way written communication**  **Description:** Patients and staff are able to send written messages to each other at different times. | **Efficiency:** Decreased workload (qualitative and quantitative) | **CERQual rating:** High  **References:** [2, 14, 22, 25-27] n=6  **Exemplar data:**  The platform was perceived to provide a unique value through the asynchronous chat, as clinical decisions could be communicated with several short messages without excessive conversation. [14] |
|  | **Non-integration with core software systems**  **Description:** OC systems that operate separately from other software used by the primary care provider. | **Efficiency:** Increased workload (qualitative) | **CERQual rating:** High  **References:** [3-6, 8, 13-16, 18, 24, 28, 29], n=13  **Exemplar data:**  The processing of the e-consult is usually more time consuming for administrative staff and GPs than an email. That e-consults could not be directly linked to patients’ notes [EHR] without administrative staff input was perceived to be a major limitation of e-consults. [16] |
| **Adopters** (expected users of OC) | **Female gender**  **Description:** Female patients. | **High adoption** (qualitative and quantitative)  **Equitable:** Decreased equity (perceived and objective) | **CERQual rating:** High  **References:** [5, 6, 8, 10, 12, 15, 16, 25-28, 30-44], n=26  **Exemplar data:**  Female patients accounted for 88% of eVisits. [10] |
|  | **Lower age**  **Description:** Younger patients. | **High adoption** (qualitative and quantitative)  **Equitable:** Decreased equity (qualitative and quantitative) | **CERQual rating:** High  **References:** [5-8, 10-13, 16, 21, 27, 28, 30, 31, 36-42, 44-48], n=26  **Exemplar data:**  On average, eVisit adopters are younger… On average, a patient's odds of eVisit use is 2.6% lower when the patient is 1 year older. [30] |
|  | **Native speakers**  **Description:** Patients who are native speakers of the official language in the country they live. | **High adoption** (qualitative and quantitative)  **Equitable:** Decreased equity (qualitative and quantitative) | **CERQual rating:** High  **References:** [5, 8, 20, 26, 42, 46, 49], n=7  **Exemplar data:**  Those who do not have English as a first language or speak English are unable to use the tools – rely on family members or community to support with translation. [20] |
|  | **High socioeconomic status**  **Description:** Patients with higher levels of income and education. | **High adoption** (qualitative and quantitative)  **Equitable:** Decreased equity (qualitative and quantitative) | **CERQual rating:** High  **References:** [5-8, 20, 26, 36, 40, 41, 50, 51], n=11  **Exemplar data:**  912 participants who had completed a virtual visit provided responses to the survey. Participants were primarily Caucasian (78.5 %), married (71.2 %), highly educated (79.8 % had a post-secondary degree), and of high family income (55.8 % had a family income of over $90,000). [26] |
|  | **Mental health conditions**  **Description:** Patients with a mental health diagnosis. | **Timeliness:** Increased access (qualitative)  **Equitable:** Increased equity (qualitative)  **Patient-centredness:** Increased patient satisfaction (qualitative and quantitative) | **CERQual rating:** High  **References:** [5, 6, 11, 13, 15, 19, 21, 26], n=8  **Exemplar data:**  Some [staff] also mentioned particular conditions and situations for which webGP may be advantageous, such as problems with mental health: ‘There’s one really good example … It was a girl with anxiety … She got embarrassed easily and stumbled over her words and that was her barrier to actually coming and discussing it in the first place.’ (P2_02/GP) [15] |
|  | **Verbal communication difficulties**  **Description:** Patients with difficulty communicating verbally e.g. those with hearing loss. | **Timeliness:** Increased access (qualitative)  **Equitable:** Increased equity (qualitative)  **Patient-centredness:** Increased patient satisfaction (qualitative and quantitative) | **CERQual rating:** High  **References:**  [1, 4, 5, 11, 13, 40, 51], n=7  **Exemplar data:**  There were certain health conditions where a non-verbal form of communication was easier:  ‘For a deaf person it is marvellous to be able to communicate without using a voice phone.’  (Male [M], 83 years) [40] |
|  | **Physical barriers to attending in-person appointments**  **Description:**  Patients cannot easily attend in-person appointments e.g. due to physical disabilities, living far from their primary care provider, work commitments, or care responsibilities. | **Timeliness:** Increased access (qualitative)  **Equitable:** Increased equity (qualitative)  **Patient-centredness:** Increased patient satisfaction (qualitative and quantitative) | **CERQual rating:** High  **References:** [5-8, 11, 15, 46, 47], n=8  **Exemplar data:**  Others favoured the online format and remote consultation style; they used the system as it was difficult to visit the practice due to disabilities, illness or working commitments… [8] |
|  | **Preference for traditional consulting methods**  **Description:** Staff and patients believe in-person consultations are the gold standard. | **Low adoption** (qualitative) | **CERQual rating:** High  **References:** [5, 7, 13, 23, 46, 50-52], n=8  **Exemplar data:**  Barriers included difficulties in making patients aware of the option to use an alternative to the face-to-face consultation and subsequently getting them to engage with these alternatives when the face-to-face consultation was still seen as the ‘gold standard’. [13] |
| **Organisation** (work needed to implement OC) | **Lack of OC promotion**  **Description:** Patients are not effectively informed that OCs are available for them to contact their primary care provider. | **Low adoption** (qualitative and quantitative) | **CERQual rating:** Moderate  **References:** [1, 5, 25, 50, 51], n=5  **Exemplar data:**  Concern that many people are unaware of the digital technologies and apps (AskmyGP, NHS), highlighting the need to raise awareness and provide support as people do not always have technologies or access to family or community groups to support them (Shielding group, BAME group). [51] |
|  | **Timely response**  **Description:** Primary care providers respond quickly to patients’ OC queries. | **Patient-centredness:** Increased patient satisfaction (qualitative and quantitative)  **Timeliness:** Increased access (qualitative) | **CERQual rating:** High  **References:** [8, 15, 16, 20, 26, 28, 53], n=7  **Exemplar data:**  Other users [patients] echoed a favour for the speed of response: “When I message them today they will call me straight away” “I like how every time I send a request I get an answer straight away” [53] |
|  | **Non-integration with daily workflows**  **Description:** Primary care provider does not coherently plan OCs into their work processes e.g. by not scheduling clinician time to deal with OCs, or not diverting as much incoming patient demand via OCs as possible. | **Efficiency:** Increased workload (qualitative and quantitative) | **CERQual rating:** High  **References:** [3-5, 7, 13-15, 17, 21, 23, 28, 29, 31], n=13  **Exemplar data:**  …providers lamented that electronic communication made the workday longer. As the number of electronic communications with patients increased, several groups tried to cut down on the number of office visits but, in most cases, the number of office visits did not decrease very much. Electronic communication therefore was often added work to a full day of office visits. [23] |
|  | **Sufficient resources allocated to implementing OCs**  **Description:** Adequate training, staff, and facilities are available to conduct OCs. | **Efficiency:** Decreased workload (qualitative) | **CERQual rating:** High  **References:** [3, 6, 7, 14, 17, 21, 23, 28], n=8  **Exemplar data:**  “We need to give them [the right training] so that they feel more confident to say, 'Okay, I diagnose you,' for example, 'You have tonsillitis. I felt confident making sure that you had to open your mouth properly and I could see your tonsils, even though it was through a phone, and therefore I could diagnose you effectively as I would have done in a face-to-face consultation.' So, people overcompensate that time and therefore they spend a little bit longer, and therefore the efficiency gained that might have been understood through the virtual consultation might not be realised.” Stakeholder [6] |
|  | **Lack of continuity**  **Description:** OC query is not dealt with by a known or preferred physician | **Patient-centredness:** Decreased patient satisfaction (qualitative) | **CERQual rating:** Moderate  **References:** [6, 11, 28, 35, 53], n=5  **Exemplar data:** When online consultations could potentially be reviewed and answered by any GP, both staff and patients noted further unintended consequences negatively impacting continuity of care: ‘[Online consultations are] very much a move from […] a nice doctor–patient relationship [...] we try and maintain continuity, but that’s difficult with this system […] often other people will pick up calls that are meant for you or the patients don’t specifically ask for you.’ (GP1, Pr1, F) [11] |
| **Wider system** (policy context) | **Government policy**  **Description:** Policies mandating OC usage e.g. by increasing digital modes of contact with primary care in general or minimising in-person contact during the COVID-19 pandemic. | **High adoption** (qualitative and quantitative) | **CERQual rating:** High  **References:** [6, 29, 36, 46, 54, 55], n=6  **Exemplar data:**  [The] significant increase of e-visits in Denmark is the result of a policy to increase the supply of e-visit by mandating GPs to offer e-visits. Whether the use of the online channel is optional for the patients, all GPs must offer the service. [36] |
|  | **Lack of financial support**  **Description:** No external funding available to pay ongoing costs of OCs. | **Low adoption** (qualitative and quantitative) | **CERQual rating:** Moderate  **References:** [3, 5, 7, 8, 46], n=5  **Exemplar data:**  None of the 36 practices took up the system after the pilot, which would have involved paying market prices for the software. However, 13 practices were interested in continuing to use the system if costs were paid for by alternative funding sources. [8] |

1. Fagerlund AJ, Holm IM, Zanaboni P. General practitioners' perceptions towards the use of digital health services for citizens in primary care: A qualitative interview study. BMJ Open. 2019 01 May;9 (5)(e028251). doi: 10.1136/bmjopen-2018-028251.

2. López Seguí F, Walsh S, Solans O, Adroher Mas C, Ferraro G, García-Altés A, et al. Teleconsultation Between Patients and Healthcare Professionals in the Catalan Primary Care Service: Message Annotation Analysis in a Retrospective Cross-Sectional Study. J Med Internet Res. 2020 Sep 17;22(9)(e19149). doi: 10.2196/19149.

3. Eldh AC, Sverker A, Bendtsen P, Nilsson E. Health Care Professionals' Experience of a Digital Tool for Patient Exchange, Anamnesis, and Triage in Primary Care: Qualitative Study. JMIR Hum Factors. 2020;7(4):e21698. PMID: 33315014. doi: 10.2196/21698.

4. Banks J, Farr M, Salisbury C, Bernard E, Northstone K, Edwards H, et al. Use of an electronic consultation system primary care: a qualitative interview study. Br J Gen Pract. 2018 Jan;68(666):E1-E8. PMID: WOS:000425962100001. doi: 10.3399/bjgp17X693509.

5. Atherton H, Brant H, Ziebland S, Bikker A, Campbell J, Gibson A, et al. The potential of alternatives to face-to-face consultation in general practice, and the impact on different patient groups: a mixed-methods case study. Health Serv Deliv Res 2018;6(20). PMID: 29889485. doi: 10.3310/hsdr06200.

6. Ipsos MORI, York Health Economics Consortium. Evaluation of Babylon GP at Hand: Final evaluation report. London2019 [cited 2020 1 Sept]; Available from: <https://www.hammersmithfulhamccg.nhs.uk/media/156123/Evaluation-of-Babylon-GP-at-Hand-Final-Report.pdf>.

7. NHS England, NHS Improvement. Online consultations research: Summary research findings. NHS England and NHS Improvement; 2019 [updated February; cited 2020 1 Sept]; Available from: <https://www.england.nhs.uk/wp-content/uploads/2019/09/online-consultations-reserach-summary-of-findings.pdf>.

8. Farr M, Banks J, Edwards HB, Northstone K, Bernard E, Salisbury C, et al. Implementing online consultations in primary care: a mixed-method evaluation extending normalisation process theory through service co-production. BMJ Open. 2018 Mar;8(3). PMID: WOS:000433881200172. doi: 10.1136/bmjopen-2017-019966.

9. Entezarjou A, Bonamy A-KE, Benjaminsson S, Herman P, Midlöv P. Human- Versus Machine Learning–Based Triage Using Digitalized Patient Histories in Primary Care: Comparative Study. JMIR Med Inform. 2020;8(9):e18930. PMID: 32880578. doi: 10.2196/18930.

10. Penza KS, Murray MA, Pecina JL, Myers JF, Furst JW. Electronic Visits for Minor Acute Illnesses: Analysis of Patient Demographics, Prescription Rates, and Follow-Up Care Within an Asynchronous Text-Based Online Visit. Telemed J E Health. 2018 2018/03/01;24(3):210-5. doi: 10.1089/tmj.2017.0091.

11. Turner A, Morris R, Rakhra D, Stevenson F, McDonagh L, Hamilton F, et al. Unintended consequences of online consultations: a qualitative study in UK primary care. Br J Gen Pract. 2022;72(715):e128. doi: 10.3399/BJGP.2021.0426.

12. Edwards HB, Marques E, Hollingworth W, Horwood J, Farr M, Bernard E, et al. Use of a primary care online consultation system, by whom, when and why: evaluation of a pilot observational study in 36 general practices in South West England. Bmj Open. 2017 Nov;7(11). PMID: WOS:000422898800064. doi: 10.1136/bmjopen-2017-016901.

13. Atherton H, Brant H, Ziebland S, Bikker A, Campbell J, Gibson A, et al. Alternatives to the face-to-face consultation in general practice: Focused ethnographic case study. Br J Gen Pract. 2018 April;68(669):e293-e300. doi: 10.3399/bjgp18X694853.

14. Entezarjou A, Bolmsjö BB, Calling S, Midlöv P, Milos Nymberg V. Experiences of digital communication with automated patient interviews and asynchronous chat in Swedish primary care: a qualitative study. BMJ Open. 2020;10(7):e036585. doi: 10.1136/bmjopen-2019-036585.

15. Carter M, Fletcher E, Sansom A, Warren FC, Campbell JL. Feasibility, acceptability and effectiveness of an online alternative to face-to-face consultation in general practice: a mixed-methods study of webGP in six Devon practices. BMJ Open. 2018 May;8(2). PMID: WOS:000433129800107. doi: 10.1136/bmjopen-2017-018688.

16. Matheson C. Implementation of WebGP and Econsultations in Wessex GP Practices: Interim Update Report. Southampton, UK: Centre of Implementation Science; 2016 [updated June; cited 2020 1 Sept]; Available from: <https://eprints.soton.ac.uk/397189/1/__soton.ac.uk_ude_personalfiles_users_cbm1a13_mydocuments_CBM%2520WebGP%2520update%252021062016IR.pdf>.

17. Casey M, Shaw S, Swinglehurst D. Experiences with online consultation systems in primary care: Case study of one early adopter site. Br J Gen Pract. 2017 November;67(664):e736-e43. doi: 10.3399/bjgp17X693137.

18. Cajander Å, Larusdottir M, Hedström G. The effects of automation of a patient-centric service in primary care on the work engagement and exhaustion of nurses. Qual User Exp. 2020 19 Sept;5(1):9. doi: 10.1007/s41233-020-00038-x.

19. Nilsson E, Sverker A, Bendtsen P, Eldh AC. A Human, Organization, and Technology Perspective on Patients’ Experiences of a Chat-Based and Automated Medical History–Taking Service in Primary Health Care: Interview Study Among Primary Care Patients. J Med Internet Res. 2021 2021/10/18;23(10):e29868. doi: 10.2196/29868.

20. Health Innovation Manchester. GM Digital First Primary Care: Patient and public insights: Workshop results. Report. Manchester: Health Innovation Manchester, 2021 Sept 2021. Report No.: 1 Contract No.: 1 Sept.

21. Cowie J, Calveley E, Bowers G, Bowers J. Evaluation of a digital consultation and self-care advice tool in primary care: A multi-methods study. Int J Environ Res Public Health. 2018 02 May;15 (5) (896). doi: 10.3390/ijerph15050896.

22. López Seguí F, Vidal-Alaball J, Sagarra Castro M, García-Altés A, García Cuyàs F. General Practitioners’ Perceptions of Whether Teleconsultations Reduce the Number of Face-to-face Visits in the Catalan Public Primary Care System: Retrospective Cross-Sectional Study. J Med Internet Res. 2020 2020/3/16;22(3):e14478. doi: 10.2196/14478.

23. Bishop TF, Press MJ, Mendelsohn JL, Casalino LP. Electronic communication improves access, but barriers to its widespread adoption remain. Health Aff. 2013;32(8):1361-7. doi: 10.1377/hlthaff.2012.1151.

24. Johansson A, Larsson M, Ivarsson B. General Practitioners' Experiences of Digital Written Patient Dialogues: A Pilot Study Using a Mixed Method. J Prim Care Community Health. 2020 Mar;11. PMID: WOS:000523514400001. doi: 10.1177/2150132720909656.

25. Adamson SC, Bachman JW. Pilot Study of Providing Online Care in a Primary Care Setting. Mayo Clin Proc. 2010;85(8):704-10. doi: 10.4065/mcp.2010.0145.

26. Kelley LT, Phung M, Stamenova V, Fujioka J, Agarwal P, Onabajo N, et al. Exploring how virtual primary care visits affect patient burden of treatment. Int J Med Inform. 2020 2020/09/01/;141:104228. doi: <https://doi.org/10.1016/j.ijmedinf.2020.104228>.

27. Padman R, Shevchik G, Paone S, Dolezal C, Cervenak J. eVisit: A Pilot Study of a New Kind of Healthcare Delivery. In: Safran C, Reti S, Marin HF, editors. Medinfo 2010, Pts I and Ii2010. p. 262-6.

28. Peber E, Wästfelt E. Impact of digi-physical healthcare. [Master Thesis] Sweden: Lund University; 2020 [cited 2020 1 Sept]; Available from: <https://lup.lub.lu.se/student-papers/search/publication/9015211>.

29. Murphy M, Scott LJ, Salisbury C, Turner A, Scott A, Denholm R, et al. Implementation of remote consulting in UK primary care following the COVID-19 pandemic: a mixed-methods longitudinal study. Br J Gen Pract. 2021;71(704):e166-e77. doi: 10.3399/bjgp.2020.0948.

30. Jung CM, Padman R. Virtualized healthcare delivery: Understanding users and their usage patterns of online medical consultations. Int J Med Inform. 2014 Dec;83(12):901-14. PMID: WOS:000346052600004. doi: 10.1016/j.ijmedinf.2014.08.004.

31. Stamenova V, Agarwal P, Kelley L, Fujioka J, Nguyen M, Phung M, et al. Uptake and patient and provider communication modality preferences of virtual visits in primary care: a retrospective cohort study in Canada. BMJ Open. 2020;10(7):e037064. doi: 10.1136/bmjopen-2020-037064.

32. Rohrer JE, Angstman KB, Adamson SC, Bernard ME, Bachman JW, Morgan ME. Impact of online primary care visits on standard costs: a pilot study. Popul Health Manag. 2010 Apr;13(2):59-63. PMID: 20415617. doi: 10.1089/pop.2009.0018.

33. Penza KS, Murray MA, Myers JF, Furst JW, Pecina JL. Management of Acute Sinusitis via e-Visit. Telemed J E Health. 2021. doi: 10.1089/tmj.2020.0047.

34. North F, Crane SJ, Chaudhry R, Ebbert JO, Ytterberg K, Tulledge-Scheitel SM, et al. Impact of Patient Portal Secure Messages and Electronic Visits on Adult Primary Care Office Visits. Telemed J E Health. 2014 2014/03/01;20(3):192-8. doi: 10.1089/tmj.2013.0097.

35. McGrail KM, Ahuja MA, Leaver CA. Virtual Visits and Patient-Centered Care: Results of a Patient Survey and Observational Study. J Med Internet Res. 2017 2017/05/26;19(5):e177. doi: 10.2196/jmir.7374.

36. Andersen KN, Nielsen JA, Kim S. Use, cost, and digital divide in online public health care: lessons from Denmark. Transforming Government- People Process and Policy. 2019 May;13(2):197-211. PMID: WOS:000484192600004. doi: 10.1108/tg-06-2018-0041.

37. Jung C, Padman R, Shevchik G, Paone S. Who are portal users vs. early e-Visit adopters? A preliminary analysis. AMIA Annu Symp Proc. 2011:1070-9. PMID: 22195168.

38. Nijhof D, Ingram A, Ochieng R, Roberts E-J, Poulton B, Ochieng B. Examining GP online consultation in a primary care setting in East Midlands, UK. BMC Health Serv Res. 2021 2021/09/30;21(1):1030. doi: 10.1186/s12913-021-07039-2.

39. Mehrotra A, Paone S, Martich GD, Albert SM, Shevchik GJ. Characteristics of patients who seek care via eVisits instead of office visits. Telemed J E Health. 2013;19(7):515-9. PMID: 23682589. doi: 10.1089/tmj.2012.0221.

40. Eccles A, Hopper M, Turk A, Atherton H. Patient use of an online triage platform: A mixed-methods retrospective exploration in UK primary care. Br J Gen Pract. 2019;69(682):E336-E44. doi: 10.3399/bjgp19X702197.

41. Ekman B, Thulesius H, Wilkens J, Lindgren A, Cronberg O, Arvidsson E. Utilization of digital primary care in Sweden: Descriptive analysis of claims data on demographics, socioeconomics, and diagnoses. Int J Med Inform. 2019;127:134-40. doi: 10.1016/j.ijmedinf.2019.04.016.

42. Player M, O'Bryan E, Sederstrom E, Pinckney J, Diaz V. Electronic Visits For Common Acute Conditions: Evaluation Of A Recently Established Program. Health Aff. 2018 Dec 2018;37(12):2024–30. PMID: 2151129411. doi: <http://dx.doi.org/10.1377/hlthaff.2018.05122>.

43. Nijland N, van Gemert-Pijnen J, Kelders SM, Brandenburg BJ, Seydel ER. Evaluation of the use of an "ask-the-expert" e-consultation service for support on health-related requests. Second International Conference on eHealth, Telemedicine, and Social Medicine; 10-16 Feb. 2010: IEEE; 2010. p. 72-6.

44. North F, Crane SJ, Stroebel RJ, Cha SS, Edell ES, Tulledge-Scheitel SM. Patient-generated secure messages and eVisits on a patient portal: are patients at risk? J Am Med Inform Assoc. 2013;20(6):1143-9. doi: 10.1136/amiajnl-2012-001208.

45. Murray MA, Penza KS, Myers JF, Furst JW, Pecina JL. Comparison of eVisit Management of Urinary Symptoms and Urinary Tract Infections with Standard Care. Telemed J E Health. 2020 2020/05/01;26(5):639-44. doi: 10.1089/tmj.2019.0044.

46. Wilson G, Currie O, Bidwell S, Saeed B, Dowell A, Halim AA, et al. Empty waiting rooms: the New Zealand general practice experience with telehealth during the COVID-19 pandemic. N Z Med J. 2021 09 Jul;134(1537):89-101.

47. Landgren S, Cajander Å. Non-use of Digital Health Consultations Among Swedish Elderly Living in the Countryside. Front Public Health. 2021 2021-September-10;9(1323). doi: 10.3389/fpubh.2021.588583.

48. Albert SM, Shevchik GJ, Paone S, Martich GD. Internet-based medical visit and diagnosis for common medical problems: experience of first user cohort. Telemed J E Health. 2011 May;17(4):304-8. PMID: 21457013. doi: 10.1089/tmj.2010.0156.

49. Bavafa H, Hitt LM, Terwiesch C. The Impact of E-Visits on Visit Frequencies and Patient Health: Evidence from Primary Care. Manage Sci. 2018;64(12):5461-80. PMID: 33033417. doi: 10.1287/mnsc.2017.2900.

50. Bertelsen P, Petersen L. Danish Citizens and General Practitioners' Use of ICT for their Mutual Communication. In: Sarkar I.N, Georgiou A, Mazzoncini de Azevedo Marques P, editors. MEDINFO 2015: eHealth-enabled Health; August; São Paulo, Brazil: IOS Press; 2015. p. 376-9.

51. Health Innovation Manchester. Greater Manchester digital primary care insight full report: Key findings from engagement June-July 2020. [Report] 2020 [cited 2021 1 Oct]; Available from: <https://healthinnovationmanchester.com/wp-content/uploads/2020/12/PCIE-DPC-Full-report-FINAL-20.10.20-1.pdf>.

52. Zanaboni P, Fagerlund AJ. Patients' use and experiences with e-consultation and other digital health services with their general practitioner in Norway: Results from an online survey. BMJ Open. 2020 17 Jun;10 (6) (e034773). doi: 10.1136/bmjopen-2019-034773.

53. Leung K, Qureshi S. Managing high frequency users of an electronic consultation system in primary care: a quality improvement project. BMJ Open Qual. 2021;10(2). PMID: WOS:000663456800001. doi: 10.1136/bmjoq-2020-001310.

54. Judson TJ, Odisho AY, Neinstein AB, Chao J, Williams A, Miller C, et al. Rapid design and implementation of an integrated patient self-triage and self-scheduling tool for COVID-19. J Am Med Inform Assoc. 2020;27(6):860-6. PMID: 32267928. doi: 10.1093/jamia/ocaa051.

55. Tarn DM, Hintz C, Mendez-Hernandez E, Sawlani SP, Bholat MA. Using virtual visits to care for primary care patients with COVID-19 symptoms. J Am Board Fam Med. 2021 February;34:S147-S51. doi: <https://doi.org/10.3122/jabfm.2021.S1.200241>.
